# Supplementary material for: Relationships between Lipid-Related Metabolites and Age-Related Macular Degeneration Vary with Complement Genotype
Source: PubMed Central journal article supplement — Ophthalmol Sci. 2022 Aug 12;2(4):100211. doi: 10.1016/j.xops.2022.100211 (PMC9755028; doi:10.1016/j.xops.2022.100211), 2022-08-12

**Supplementary Figure 2.** Allele frequencies of the four complement system genetic variants according to the ethnic group (C: Chinese, I: Indians, M: Malay).

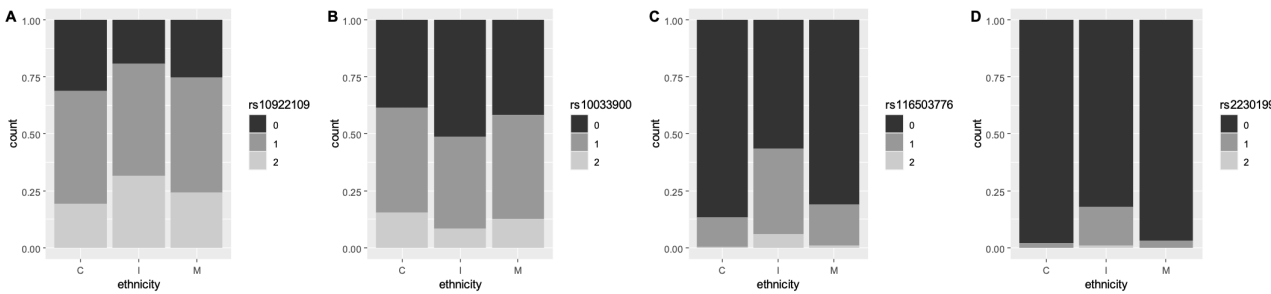

Supplement: mmc2.pdf [file mmc2.pdf]
